# Supplementary material
Source: publisher site journal article supplement (https://www.dovepress.com/article/579237)
Supplement: Supplementary file 1 [file Supplement%20579237.pdf]

## **SUPPLEMENTARY MATERIAL**

### **EFFICACY OF CONTINUOUS PEGCETACOPLAN TREATMENT FOR SUBFOVEAL GEOGRAPHIC ATROPHY IN AGE-RELATED MACULAR DEGENERATION: 36-MONTH RESULTS FROM OAKS, DERBY, AND GALE OPEN-LABEL EXTENSION**

#### **Names of Approving Ethics Committees and Study Sites in GALE:**

- Asheville Eye Associates (AEA) - Asheville
- Assaf Harofeh Medical Center
- Associated Retina Consultants - Phoenix
- Associated Retinal Consultants PC - Grand Rapids
- Associated Retinal Consultants PC - Traverse City
- Associates in Ophthalmology - West Mifflin Office and Surgery Center
- Austin Clinical Research, LLC
- Axon Clinical
- Bascom Palmer Eye Institute - University of Miami Health System (Miami, FL)
- Bascom Palmer Eye Institute - University of Miami Health System (Naples, FL)
- Bascom Palmer Eye Institute - University of Miami Health System - Palm Beach Gardens
- Bay Area Retina Associates - Walnut Creek
- Black Hills Regional Eye Institute
- Bristol Eye Hospital
- Brown Retina Institute
- Calderdale and Huddersfield NHS Foundation Trust - Calderdale Royal Hospital
- California Retina Consultants
- California Retina Consultants (CRC) - Bakersfield Office
- Carmel Medical Center
- CEDOES Diagnóstico e Pesquisa
- Center for Retina and Macular Disease - Winter Haven
- Centre Hospitalier Intercommunal de Créteil
- Centre Hospitalier National d'Ophtalmologie (CHNO) des Quinze-Vingts
- Centre Hospitalier Universitaire de Nantes (CHU de Nantes) - Hotel-Dieu
- Centre Monticelli Paradis d'Ophtalmologie
- Centre Ophtalmologique d'Imagerie et de Laser
- Centre Ophtalmologique de l'Odeon
- Centre Ophtalmologique Maison-Rouge
- Centre Ophtalmologique Maison-Rouge
- Centro Médico Teknon
- Centro Oftalmológico Dr. Charles SA
- Centro Privado de ojos Romagosa SA
- Centrum Medyczne UNO-MED – Tarnowie - ul. Gumniska 11
- Charles Retina Institute
- Charlotte Eye, Ear, Nose & Throat Associates, PA - SouthPark Location
- CHU Dijon - Hôpital François Mitterrand
- CHU Hopitaux de Bordeaux - Groupe Hospitalier Pellegrin
- Cleveland Clinic
- Clinica Oftalmologica Sao Lucas - Retina Clinic
- Clinica Oxion
- Clinique du Val d'Ouest - Centre Ophtalmologique Pole Vision
- Colorado Retina Associates (CRA) - Red Rocks Medical Center Location
- Cumberland Valley Retina Consultants (CVRC)
- Danbury Eye Physicians & Surgeons, P.C.

- Diagnostico Ocular
- Doheny Eye Center
- Duke University Medical Center
- East Florida Eye Institute
- Elman Retina Group, PA - Baltimore
- Eye Associates of New Mexico - Albuquerque - Retina Center Location
- EyeHealth Northwest
- Fakultní nemocnice Královské Vinohrady
- Fakultní Nemocnice Ostrava
- Florida Eye Microsurgical Institute, Inc - Boynton Beach
- Fundacion Zambrano - Cirugia Ocular
- Gemini Eye Clinic - Zlin
- Georgia Retina PC - Marietta
- Graystone Eye - Hickory Office
- Hadassah University Medical Center
- Hamilton Eye Clinic
- Hôpital de la Croix-Rousse
- Hôpital Lariboisière
- Hôpitaux Universitaires de Strasbourg - Hôpital Civil
- Hospital Universitario Puerta de Hierro - Madrid
- Houston Eye Associates (HEA) - Gramercy Location
- Instituto Oftalmologico de Cordoba S.A. Privado
- Instituto Oftalmologico Gomez-Ulla
- IPEPO - Instituto da Visão - Vila Clementino
- IRCCS Ospedale San Raffaele
- John A. Moran Eye Center - University of Utah Health Care
- King's College Hospital NHS Foundation Trust
- Klinikum der Stadt Ludwigshafen gGmbH
- Klinikum rechts der Isar der TU München
- Laser Vision Group
- Lions Eye Institute (LEI) - Nedlands
- Long Island Vitreoretinal Consultants - Great Neck
- Ludwig-Maximilians-Universitaet Muenchen - Augenklinik
- Marsden Eye Specialists (MES) - Parramatta
- Medical Center Ophthalmology Associates (MCOA) - Northwest Clinic Location
- Microcirugia Ocular Rosario
- Mid Atlantic Retina - Bethlehem
- Mid Atlantic Retina - Huntingdon Valley
- Mid Atlantic Retina Specialists
- Midwest Eye Institute
- National Ophthalmic Research Institute
- New England Retina Consultants, PC
- Northern California Retina Vitreous Associates Medical Group, Inc. - Mountain View Office
- Northwestern Memorial Hospital - Arkes Family Pavilion
- Oftalmika - Prywatna Klinika Okulistyczna
- Oftalmólogos Especialistas
- Ophthalmic Consultants of Boston, Inc.
- Ophthalmic Consultants of Long Island
- Orange County Retina Medical Group
- Oregon Retina, LLC - Oregon Eye Associates
- Organización Médica de Investigación (OMI)
- Osrodek Chirurgii Oka Prof. Zbigniewa Zagorskiego Spolka z o.o.
- Pacific Northwest Retina

- Pinnacle Research Institute, Inc.
- Polo Università degli Studi di Milano - Ospedale Luigi Sacco - Clinica Oculistica
- Radboud UMC
- Rambam Medical Center
- Retina & Eye Consultants
- Retina Associates New Orleans - Jefferson Parish Location
- Retina Associates of Cleveland, Inc - Beachwood
- Retina Associates of Cleveland, Inc - Middleburg Heights
- Retina Associates of Cleveland, Inc - Youngstown
- Retina Associates of Florida, PA - Tampa - MacDill Ave
- Retina Associates of Kentucky
- Retina Associates of New Jersey P.A. and Retina-Vitreous Center - New Brunswick
- Retina Associates of New Jersey P.A. and Retina-Vitreous Center - Toms River
- Retina Associates of South Texas, PA - San Antonio
- Retina Associates of Southern California
- Retina Associates of Utah, PC
- Retina Centre of Ottawa
- Retina Consultants of Orange County - Fullerton Office
- Retina Consultants of Texas - Houston
- Retina Consultants of Texas - San Antonio Medical Center
- Retina Consultants of Texas - The Woodlands
- Retina Consultants San Diego
- Retina Group of New England - New London
- Retina Health Center - Fort Myers
- Retina Northwest, PC (Portland, OR)
- Retina Northwest, PC (Augusta, GA)
- Retina Specialty Institute - Pensacola
- Retina Vitreous Center (RVC)
- Retina Vitreous Consultants - Monroeville
- Retina-Vitreous Associates Medical Group
- Retinal Consultants of Arizona, Ltd.
- Retinal Diagnostic Center
- Royal Liverpool University Hospital
- Rush University Medical Center
- Save Sight Institute (SSI) - University of Sydney
- Sierra Eye Associates
- Southeast Eye Institute PA - Eye Associates of Pinellas
- Southern Eye Specialists
- Southwest Retina Consultants
- Specjalistyczny Ośrodek Okulistyczny Oculomedica
- Spokane Eye Clinic - South Hill/Downtown
- St. Franziskus-Hospital GmbH
- St. James's University Hospital
- St. Joseph's Hospital
- Stanford Health Care - Byers Eye Institute
- Stone Alfredo Enrique Médico Oftalmólogo
- Strathfield Retina Clinic
- STZ eyetrial
- Sunderland Eye Infirmary
- Sydney Retina Clinic & Day Surgery
- Sydney West Retina
- Tel Aviv Sourasky Medical Center
- Tennessee Retina, PC - Nashville - Centennial Professional Plaza

- Texas Retina Associates
- The Macula Center Clearwater
- The North West London Hospitals NHS Trust - Central Middlesex Hospital
- The Ohio State University Research Foundation
- The Retina Care Center, LLC
- The Retina Center Of New Jersey, LLC - Bloomfield
- The Retina Clinic London
- The Retina Group of Washington - Fairfax
- The Retina Group of Washington (RGW) - Chevy Chase
- The Retina Partners - Encino
- The University of Melbourne - The Centre for Eye Research Australia
- Tufts Medical Center
- Universitaetsklinikum Muenster (UKM) - Klinik fuer Augenheilkunde
- Universitätsklinikum Freiburg
- Universitätsklinikum Köln
- Universitätsklinikum Regensburg
- Universitätsklinikum Schleswig-Holstein
- Universitätsmedizin Göttingen
- Universiteit Van Amsterdam - Academisch Medisch Centrum
- University of Bonn
- University of California Irvine - School of Medicine - The Gavin Herbert Eye Institute
- University of California San Diego - Shiley Eye Institute
- University of Michigan - Kellogg Eye Center
- University of Ottawa Heart Institute
- University of South Florida Health- Morsani Center for Advanced Healthcare
- University of Virginia
- University of Wisconsin Health - University Station Clinic
- Valley Retina Institute, PA - McAllen
- Virginia Retina Specialists - Falls Church
- VitreoRetinal Surgery, PA - Edina Location
- Vitreous Retina Macula Consultants of New York (VRMNY) - Manhattan
- Všeobecná fakultní nemocnice v Praze
- Wills Eye Hospital
